# Supplementary material
Source: PubMed Central journal article supplement (PMC4226591)
Supplement: cei0177-0404-SD1.pdf [file cei0177-0404-SD1.pdf]

## SupplementaryTable 1

### Clinical characteristics of patients

|      | no. of subjects | age | f:m ratio | disease duration: years (mean, SD, median) | EDSS (median, range) | Natalizumab treatment duration: months (mean, SD, median) |
|------|-----------------|-----|-----------|--------------------------------------------|----------------------|-----------------------------------------------------------|
| HD   | 41              | 37  | 1.4:1     | n/a                                        | n/a                  | n/a                                                       |
| RRMS | 30              | 38  | 2.75:1    | 3.0, 5.7, 1.0                              | 2.0 (0-4.5)          | n/a                                                       |
| NAT  | 32              | 34  | 1.9:1     | 6.7, 5.0, 6.0                              | 2.5 (1.0-4.5)        | 20.0, 18.0, 16.5                                          |

Supplementary Figure 1

Antigen-induced IFN $\gamma$  production by single and double positive T cells

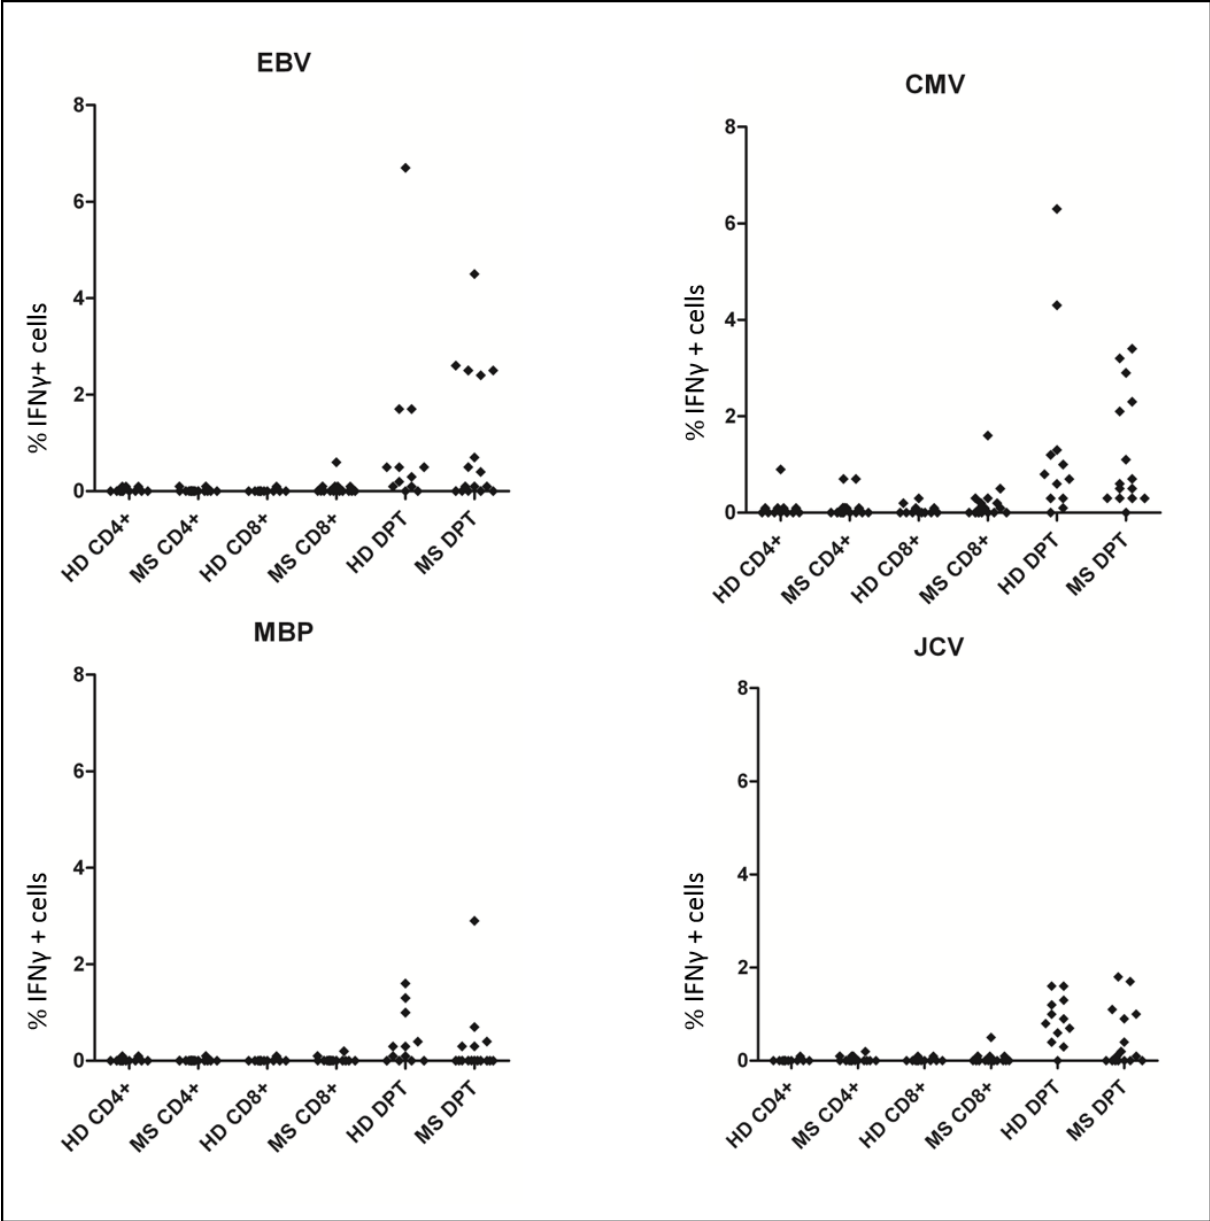

IFN $\gamma$  secretion by CD4+, CD8+ single positive or CD4+CD8+ double positive T cells in response to different antigenic stimuli (MBP, CMV pp65, JCV VP-1 or EBV EBNA-1 peptide pools) were assessed by intracellular cytokine staining. The percentage of IFN $\gamma$  positive cells within the respective T cell subpopulations is shown for controls as well as RRMS patients.

Supplementary Figure 2

Single and double positive T cell proliferation induced by JCV peptide pools

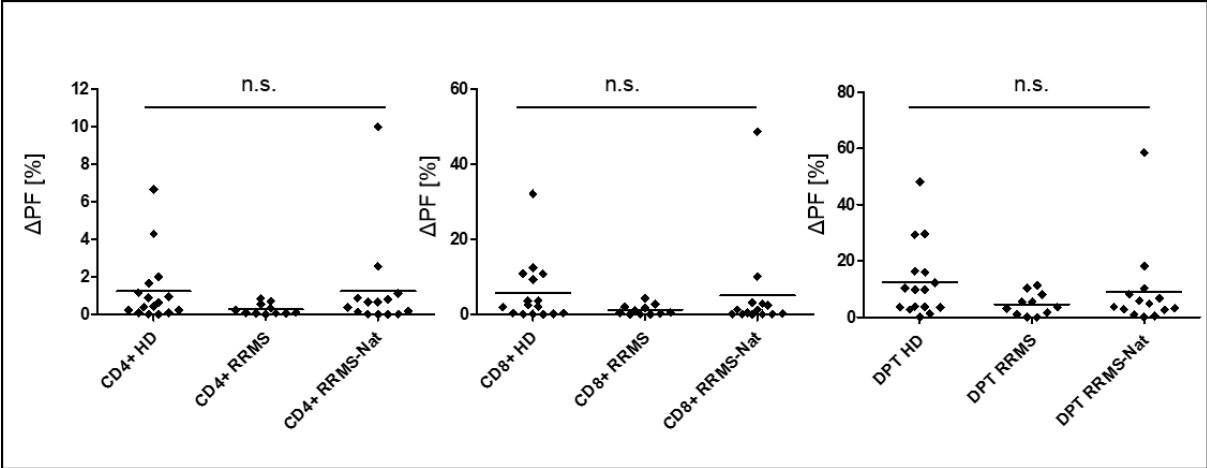

Comparative analysis of proliferative T cell responses to JCV VP-1 peptide pools in healthy donors (HD), untreated RRMS patients and Natalizumab treated MS patients (RRMS-NAT) as detected by CFDA-SE proliferation assay. No significant differences were observed (Kruskal-Wallis/Dunns Multiple Comparison).
